# Supplementary material for: APOE Stabilization by Exercise Prevents Aging Neurovascular Dysfunction and Complement Induction
Source: PLoS Biol. 2015 Oct 29;13(10):e1002279. doi: 10.1371/journal.pbio.1002279 (PMC4626092; doi:10.1371/journal.pbio.1002279)
Supplement: S1 Dataset — (XLSX) [file pbio.1002279.s001.xlsx]

## Sheet: Fig1F
% Fibrin Area
	Young	Aged
	0.9135	5.5805
	0.8125	5.35
	0.558	0.8705
	0.123	4.684
	0.193	3.881
	0.11	2.09167
Mean ± SEM of Young	0.4517 ± 0.1468, n=6
Mean ± SEM of Aged	3.743 ± 0.7712, n=6

## Sheet: Fig2B
Relative number of PDGFRb cells				Relative PDGFRb coverage
	Young	Aged			Young	Aged
	0.953691	0.830081			1.02702	0.652182
	1.06458	0.744291			1.18647	0.500852
	0.842796	0.676628			1.00008	0.458594
	1.10894	0.715084			0.82785	0.48335
	1.0291	0.849162			1.01252	0.544387
	1.02023	0.756983			0.946066	0.780622
				Mean ± SEM of column A	1.002 ± 0.04778, n=6
Mean ± SEM of Young	1.002 ± 0.03877, n=6			Mean ± SEM of column B	0.5683 ± 0.05049, n=6
Mean ± SEM of Aged	0.7633 ± 0.02667, n=6

## Sheet: Fig3C
Relative IBA1+ cells
	Young	Aged
	0.893294	1.51738
	1.17474	1.39011
	1.0279	1.38277
	0.905531	1.27264
Mean ± SEM of Young	1.000 ± 0.06559, n=4
Mean ± SEM of Aged	1.391 ± 0.05004, n=4

## Sheet: Fig4B
Abundance of AQP4 (Western Blot)
	Young	Aged
	1.25716	0.208485
	0.819178	0.154441
	0.669113	0.166081
	1.26312	0.404557
Mean ± SEM of Young	1.002 ± 0.1521, n=4
Mean ± SEM of Aged	0.2334 ± 0.05823, n=4

## Sheet: Fig5B
Average Distance per night
	7m Rn	18m Rn
	1.17193	3.10594
	3.51729	2.31219
	3.571	0.305909
	1.36116	0.793482
	1.52455	1.89938
	0.756509	2.50363
	0.805533	1.85542
Mean ± SEM of 7m Rn	1.816 ± 0.4583, n=7
Mean ± SEM of 18m Rn	1.826 ± 0.3689, n=7

## Sheet: Fig5C
Grip Strenght/ Hanging time
	Aging	Aged Sd	Aged Rn
	60	8	8
	60	6	60
	60	2	60
	25	3	60
	60	7	60
		40	60
		8	60
Mean ± SEM of Aging	53.00 ± 7.000, n=5
Mean ± SEM of Aged Sd	10.57 ± 4.985, n=7
Mean ± SEM of Aged Rn	53.00 ± 7.000, n=5

## Sheet: Fig5D
Nest Construction/Nest Scoring
	Aging	Aged Sd	Aged Rn
	4	2	4.5
	4.5	3.5	5
	5	4.5	3.5
	3.5	2	5
	4.5	2	5
	5	3	5
		2.5	2
Mean ± SEM of Aging	4.417 ± 0.2386, n=6
Mean ± SEM of Aged Sd	2.786 ± 0.3595, n=7
Mean ± SEM of Aged Rn	4.286 ± 0.4345, n=7

## Sheet: Fig5E
Burrowing/Displaced Food
	Young	Aging	Aged Sd	Aged Rn
	192	0	112	188
	142	0	0	134
	84	154	0	122
	138	150	182	106
	200	142	142	200
	200	200	128	198
	122	0	148	184
Mean ± SEM of Young	154.0 ± 16.90, n=7
Mean ± SEM of Aging	92.29 ± 33.37, n=7
Mean ± SEM of Aged Sd	101.7 ± 27.47, n=7
Mean ± SEM of Aged Rn	161.7 ± 14.98, n=7

## Sheet: Fig5G
Average NeuN+ cells				Fraction Arc/NeuN+ cells
	Aged Sd	Aged Rn			Aged Sd	Aged Rn
	102	108.5			0.43	0.72
	118.5	98.75			0.54	0.75
	120.75	105.75			0.71	0.67
	113.25	97.33			0.36	0.73
	87.6	86.25			0.51	0.64
Mean ± SEM of Aged Sd	108.4 ± 6.130, n=5			Mean ± SEM of Aged Sd	0.5100 ± 0.05908, n=5
Mean ± SEM of Aged Rn	99.32 ± 3.878, n=5			Mean ± SEM of Aged Rn	0.7020 ± 0.02035, n=5

## Sheet: Fig6B
Fibrin % Area
	Aged Sd	Aged Rn
	5.3075	2.97
	0.8625	2.6
	4.5235	0.87
	2.228	0.82
	4.295	0.05
	3.927	1.6
	3.557	1.571
Mean ± SEM of Aged Sd	3.529 ± 0.5711, n=7
Mean ± SEM of Aged Rn	1.497 ± 0.3888, n=7

[truncated: 40 more sheets: Fig6D, Fig6F, Fig7B, Fig7E, Fig7G, Fig8B, Fig8D, Fig8F, Fig8H, Fig9B, Fig9D, Fig10B, Fig10D, Fig10F, Fig S1A, Fig S1B, Fig S2B, Fig S3A, Fig S3B, Fig S4B …]
